# Supplementary material for: Socioeconomic Inequalities in the Kidney Transplantation Process: A Registry-Based Study in Sweden
Source: PubMed Central journal article supplement — Transplant Direct. 2018 Jan 24;4(2):e346. doi: 10.1097/TXD.0000000000000764 (PMC5811275; doi:10.1097/txd.0000000000000764), 2018-01-24
Supplement: txd-4-e346-s001.pdf [file txd-4-e346-s001.pdf]

## Supplemental Digital Content (SDC)

Table S1. Sensitivity analysis: association between income (5 years before dialysis/average over the 5 years prior to dialysis) and access to the waiting list/access to kidney transplantation conditional on transplant listing, by Cox proportional hazard regression

| Variables included in the model                              | Access to the kidney waiting list         |                                                            | Access to kidney transplantation conditional on waitlisting |                                                           |
|--------------------------------------------------------------|-------------------------------------------|------------------------------------------------------------|-------------------------------------------------------------|-----------------------------------------------------------|
|                                                              | Income 5 years before dialysis (n=13,759) | Average income over the 5 years before dialysis (n=13,751) | Income 5 years before dialysis (n=2,607)                    | Average income over the 5 years before dialysis (n=2,605) |
|                                                              | Model 1 HR (95% CI)                       | Model 2 HR (95% CI)                                        | Model 3 HR (95% CI)                                         | Model 4 HR (95% CI)                                       |
| <b>Disposable income (ref = quintile 1)</b>                  |                                           |                                                            |                                                             |                                                           |
| Quintile 2                                                   | 0.94<br>(0.82–1.07)                       | 1.06<br>(0.93–1.21)                                        | 1.05<br>(0.90–1.21)                                         | 1.04<br>(0.89–1.21)                                       |
| Quintile 3                                                   | 1.08<br>(0.95–1.23)                       | 1.15*<br>(1.01–1.32)                                       | 1.01<br>(0.87–1.16)                                         | 1.08<br>(0.93–1.25)                                       |
| Quintile 4                                                   | 1.36***<br>(1.21–1.54)                    | 1.44***<br>(1.27–1.63)                                     | 1.12<br>(0.97–1.29)                                         | 1.20*<br>(1.04–1.38)                                      |
| Quintile 5                                                   | 1.55***<br>(1.37–1.75)                    | 1.86***<br>(1.64–2.11)                                     | 1.15*<br>(1.01–1.33)                                        | 1.22**<br>(1.06–1.41)                                     |
| <b>Education (ref = mandatory)</b>                           |                                           |                                                            |                                                             |                                                           |
| Secondary school                                             | 1.28***<br>(1.16–1.40)                    | 1.25***<br>(1.14–1.37)                                     | 0.93<br>(0.84–1.04)                                         | 0.93<br>(0.83–1.03)                                       |
| Higher education                                             | 1.90***<br>(1.69–2.13)                    | 1.80***<br>(1.60–2.02)                                     | 1.14*<br>(1.01–1.29)                                        | 1.12<br>(0.99–1.26)                                       |
| <b>Age at dialysis/being waitlisted, years (ref = 18–39)</b> |                                           |                                                            |                                                             |                                                           |
| 40–49                                                        | 0.78***<br>(0.68–0.89)                    | 0.77***<br>(0.67–0.88)                                     | 0.77**<br>(0.66–0.90)                                       | 0.77**<br>(0.66–0.90)                                     |
| 50–59                                                        | 0.55***<br>(0.48–0.63)                    | 0.53***<br>(0.46–0.60)                                     | 0.79**<br>(0.68–0.92)                                       | 0.78**<br>(0.67–0.90)                                     |
| 60+                                                          | 0.10***<br>(0.09–0.12)                    | 0.10***<br>(0.09–0.11)                                     | 0.83*<br>(0.70–0.97)                                        | 0.81*<br>(0.69–0.95)                                      |
| <b>Gender (ref = female)</b>                                 |                                           |                                                            |                                                             |                                                           |
| Male                                                         | 1.06<br>(0.98–1.16)                       | 1.04<br>(0.96–1.13)                                        | 1.01<br>(0.92–1.11)                                         | 1.00<br>(0.91–1.10)                                       |
| <b>Year of dialysis/being waitlisted<sup>#</sup></b>         | 0.97***<br>(0.96–0.98)                    | 0.97***<br>(0.96–0.98)                                     | 1.01<br>(1.00–1.02)                                         | 1.01<br>(1.00–1.02)                                       |
| <b>Marital status (ref = married)</b>                        |                                           |                                                            |                                                             |                                                           |
| Single                                                       | 0.72***<br>(0.66–0.80)                    | 0.73***<br>(0.66–0.80)                                     | 1.03<br>(0.92–1.15)                                         | 1.02<br>(0.92–1.14)                                       |

|                                                          |                        |                        |                        |                        |
|----------------------------------------------------------|------------------------|------------------------|------------------------|------------------------|
| Divorced                                                 | 0.85**<br>(0.76–0.95)  | 0.85**<br>(0.77–0.95)  | 0.90<br>(0.80–1.02)    | 0.90<br>(0.79–1.01)    |
| Widowed                                                  | 0.41***<br>(0.33–0.51) | 0.40***<br>(0.32–0.50) | 0.73*<br>(0.56–0.95)   | 0.71*<br>(0.55–0.93)   |
| <b>Citizenship<br/>(ref = non-Swedish)</b>               |                        |                        |                        |                        |
| Swedish                                                  | 1.26*<br>(1.03–1.54)   | 1.23*<br>(1.00–1.51)   | 1.08<br>(0.87–1.35)    | 1.08<br>(0.87–1.35)    |
| Missing                                                  | 1.17<br>(0.91–1.50)    | 1.15<br>(0.89–1.47)    | 1.10<br>(0.83–1.45)    | 1.09<br>(0.82–1.43)    |
| <b>Home county<sup>§</sup><br/>(ref = no KTx centre)</b> |                        |                        |                        |                        |
| KTx centre                                               | 0.99<br>(0.92–1.07)    | 0.98<br>(0.91–1.06)    | 0.95<br>(0.87–1.03)    | 0.94<br>(0.87–1.03)    |
| <b>Blood type (ref = O)</b>                              |                        |                        |                        |                        |
| A                                                        |                        |                        | 2.01***<br>(1.82–2.22) | 2.00***<br>(1.82–2.21) |
| B                                                        |                        |                        | 1.51***<br>(1.31–1.75) | 1.51***<br>(1.31–1.75) |
| AB                                                       |                        |                        | 3.46***<br>(2.84–4.23) | 3.47***<br>(2.84–4.23) |

CI = confidence interval; HR = hazard ratio; ref = reference group; KTx = kidney transplantation.

For a definition of quintiles 1–5, see Table 1. #Year of dialysis/being waitlisted was treated as a continuous variable. §Whether patients' home county has a Tx centre.

\*\*\*p<0.001; \*\*p<0.01; \*p<0.05.

Table S2. Association between income and access to the waiting list/kidney transplantation for men and women separately, by Cox proportional hazard regression

| Variables included in the model                                          | Access to the kidney waiting list |                                    | Access to kidney transplantation |                                 |
|--------------------------------------------------------------------------|-----------------------------------|------------------------------------|----------------------------------|---------------------------------|
|                                                                          | Men<br>(n=9,171)<br>HR (95% CI)   | Women<br>(n=4,811 )<br>HR (95% CI) | Men<br>(n=1,781)<br>HR (95% CI)  | Women<br>(n=913)<br>HR (95% CI) |
| <b>Disposable income<br/>(ref = quintile 1)</b>                          |                                   |                                    |                                  |                                 |
| Quintile 2                                                               | 0.98<br>(0.83–1.16)               | 1.04<br>(0.84–1.29)                | 1.20<br>(0.99–1.45)              | 1.30*<br>(1.02–1.67)            |
| Quintile 3                                                               | 0.91<br>(0.77–1.08)               | 1.08<br>(0.87–1.35)                | 0.92<br>(0.76–1.12)              | 1.19<br>(0.92–1.53)             |
| Quintile 4                                                               | 1.21*<br>(1.03–1.41)              | 1.52***<br>(1.22–1.89)             | 1.22*<br>(1.02–1.45)             | 1.33*<br>(1.04–1.72)            |
| Quintile 5                                                               | 1.73***<br>(1.49–2.01)            | 1.78***<br>(1.42–2.23)             | 1.30**<br>(1.10–1.53)            | 1.51**<br>(1.17–1.97)           |
| <b>Education<br/>(ref = mandatory)</b>                                   |                                   |                                    |                                  |                                 |
| Secondary school                                                         | 1.20**<br>(1.07–1.34)             | 1.37***<br>(1.16–1.62)             | 0.93<br>(0.82–1.05)              | 0.88<br>(0.73–1.06)             |
| Higher education                                                         | 1.86***<br>(1.63–2.14)            | 1.74***<br>(1.42–2.12)             | 1.01<br>(0.86–1.17)              | 1.15<br>(0.92–1.42)             |
| <b>Age at<br/>dialysis/being<br/>waitlisted, years<br/>(ref = 18–39)</b> |                                   |                                    |                                  |                                 |
| 40–49                                                                    | 0.72***<br>(0.61–0.85)            | 0.80*<br>(0.65–0.99)               | 0.76**<br>(0.63–0.92)            | 0.82<br>(0.64–1.05)             |
| 50–59                                                                    | 0.53***<br>(0.45–0.63)            | 0.49***<br>(0.39–0.60)             | 0.75**<br>(0.63–0.90)            | 0.84<br>(0.65–1.07)             |
| 60+                                                                      | 0.10***<br>(0.08–0.12)            | 0.10***<br>(0.08–0.13)             | 0.74**<br>(0.61–0.90)            | 0.93<br>(0.72–1.21)             |
| <b>Year of dialysis/being<br/>waitlisted<sup>#</sup></b>                 | 0.97***<br>(0.96–0.98)            | 0.98**<br>(0.96–0.99)              | 1.00<br>(0.98–1.01)              | 1.03**<br>(1.01–1.05)           |
| <b>Marital status<br/>(ref = married)</b>                                |                                   |                                    |                                  |                                 |
| Single                                                                   | 0.75***<br>(0.67–0.85)            | 0.76**<br>(0.64–0.90)              | 0.95<br>(0.84–1.09)              | 1.28*<br>(1.06–1.55)            |
| Divorced                                                                 | 0.86*<br>(0.75–0.99)              | 0.87<br>(0.73–1.04)                | 0.89<br>(0.76–1.04)              | 0.92<br>(0.75–1.12)             |
| Widowed                                                                  | 0.39***<br>(0.27–0.56)            | 0.42***<br>(0.31–0.57)             | 0.78<br>(0.51–1.19)              | 0.70*<br>(0.50–0.99)            |
| <b>Citizenship<br/>(ref = non-Swedish)</b>                               |                                   |                                    |                                  |                                 |
| Swedish                                                                  | 1.21<br>(0.97–1.51)               | 1.16<br>(0.86–1.57)                | 1.07<br>(0.84–1.36)              | 1.21<br>(0.86–1.71)             |
| Missing                                                                  | 1.14<br>(0.86–1.52)               | 1.10<br>(0.75–1.62)                | 1.05<br>(0.76–1.45)              | 1.35<br>(0.87–2.11)             |
| <b>Home county<sup>§</sup><br/>(ref = no KTx centre)</b>                 |                                   |                                    |                                  |                                 |
| KTx centre                                                               | 0.96                              | 1.06                               | 1.01                             | 0.81**                          |

|                             |             |             |                        |                        |
|-----------------------------|-------------|-------------|------------------------|------------------------|
|                             | (0.88–1.06) | (0.92–1.21) | (0.91–1.12)            | (0.70–0.94)            |
| <b>Blood type (ref = O)</b> |             |             |                        |                        |
| A                           |             |             | 2.02***<br>(1.79–2.28) | 2.24***<br>(1.89–2.66) |
| B                           |             |             | 1.53***<br>(1.28–1.82) | 1.52**<br>(1.19–1.94)  |
| AB                          |             |             | 4.49***<br>(3.54–5.69) | 2.23***<br>(1.53–3.26) |

CI = confidence interval; HR = hazard ratio; ref = reference group; KTx = kidney transplantation. For

a definition of quintiles 1–5, see Table 1. #Year of dialysis/being waitlisted was treated as a

continuous variable. §Whether patients' home county has a Tx centre. \*\*\*p<0.001; \*\*p<0.01;

\*p<0.05.

Table S3. Association between education and access to the waiting list/kidney transplantation for men and women separately, by Cox proportional hazard regression

| Variables included in the model                                 | Access to the kidney waiting list |                                   | Access to kidney transplantation |                                 |
|-----------------------------------------------------------------|-----------------------------------|-----------------------------------|----------------------------------|---------------------------------|
|                                                                 | Men<br>(n=9,171)<br>HR (95% CI)   | Women<br>(n=4,811)<br>HR (95% CI) | Men<br>(n=1,781)<br>HR (95% CI)  | Women<br>(n=913)<br>HR (95% CI) |
| <b>Education</b><br>(ref = mandatory)                           |                                   |                                   |                                  |                                 |
| Secondary school                                                | 1.31***<br>(1.17–1.46)            | 1.47***<br>(1.24–1.73)            | 0.95<br>(0.84–1.07)              | 0.92<br>(0.77–1.11)             |
| Higher education                                                | 2.20***<br>(1.93–2.51)            | 2.07***<br>(1.71–2.51)            | 1.07<br>(0.92–1.24)              | 1.26*<br>(1.02–1.54)            |
| <b>Age at dialysis/being waitlisted, years</b><br>(ref = 18–39) |                                   |                                   |                                  |                                 |
| 40–49                                                           | 0.75**<br>(0.64–0.89)             | 0.84<br>(0.68–1.04)               | 0.77**<br>(0.64–0.93)            | 0.86<br>(0.67–1.10)             |
| 50–59                                                           | 0.59***<br>(0.50–0.69)            | 0.57***<br>(0.46–0.70)            | 0.77**<br>(0.65–0.93)            | 0.93<br>(0.73–1.18)             |
| 60+                                                             | 0.11***<br>(0.09–0.13)            | 0.11***<br>(0.09–0.14)            | 0.78*<br>(0.65–0.95)             | 1.06<br>(0.83–1.36)             |
| <b>Year of dialysis/being waitlisted<sup>#</sup></b>            | 0.98**<br>(0.97–0.99)             | 0.98**<br>(0.96–0.99)             | 1.00<br>(0.99–1.01)              | 1.03**<br>(1.01–1.04)           |
| <b>Marital status</b><br>(ref = married)                        |                                   |                                   |                                  |                                 |
| Single                                                          | 0.73***<br>(0.65–0.82)            | 0.77**<br>(0.64–0.91)             | 0.96<br>(0.84–1.09)              | 1.34**<br>(1.11–1.62)           |
| Divorced                                                        | 0.86*<br>(0.75–0.98)              | 0.88<br>(0.74–1.05)               | 0.91<br>(0.78–1.06)              | 0.93<br>(0.76–1.13)             |
| Widowed                                                         | 0.41***<br>(0.28–0.58)            | 0.44***<br>(0.33–0.59)            | 0.80<br>(0.53–1.22)              | 0.73<br>(0.52–1.03)             |
| <b>Citizenship</b><br>(ref = non-Swedish)                       |                                   |                                   |                                  |                                 |
| Swedish                                                         | 1.35**<br>(1.09–1.68)             | 1.28<br>(0.95–1.72)               | 1.15<br>(0.91–1.46)              | 1.32<br>(0.94–1.85)             |
| Missing                                                         | 1.31<br>(0.99–1.74)               | 1.16<br>(0.79–1.71)               | 1.13<br>(0.83–1.56)              | 1.41<br>(0.91–2.18)             |
| <b>Home county<sup>§</sup></b><br>(ref = no KTx centre)         |                                   |                                   |                                  |                                 |
| KTx centre                                                      | 0.98<br>(0.89–1.08)               | 1.10<br>(0.97–1.26)               | 1.01<br>(0.91–1.13)              | 0.83*<br>(0.71–0.96)            |
| <b>Blood type (ref = O)</b>                                     |                                   |                                   |                                  |                                 |
| A                                                               |                                   |                                   | 2.00***<br>(1.77–2.25)           | 2.21***<br>(1.87–2.62)          |
| B                                                               |                                   |                                   | 1.52***<br>(1.27–1.81)           | 1.46**<br>(1.15–1.86)           |
| AB                                                              |                                   |                                   | 4.49***<br>(3.54–5.69)           | 2.21***<br>(1.51–3.23)          |

CI = confidence interval; HR = hazard ratio; ref = reference group; KTx = kidney transplantation.

#Year of dialysis/being waitlisted was treated as a continuous variable. §Whether patients' home county has a Tx centre. \*\*\* $p < 0.001$ ; \*\* $p < 0.01$ ; \* $p < 0.05$  .

Table S4. Sensitivity analysis: association between income (excluding patients with negative and very low disposable income) and access to the waiting list/access to kidney transplantation conditional on transplant listing, by Cox proportional hazard regression

| Variables included in the model                                      | Access to the kidney waiting list<br>(n=13, 305 ) HR (95% CI) | Access to kidney transplantation<br>(n= 2, 499) HR (95% CI) |
|----------------------------------------------------------------------|---------------------------------------------------------------|-------------------------------------------------------------|
| <b>Disposable income<br/>(ref = quintile 1)</b>                      |                                                               |                                                             |
| <b>Quintile 2</b>                                                    | 1.04<br>(0.90–1.20)                                           | 1.19*<br>(1.02–1.40)                                        |
| <b>Quintile 3</b>                                                    | 1.03<br>(0.89–1.18)                                           | 1.03<br>(0.88–1.21)                                         |
| <b>Quintile 4</b>                                                    | 1.38***<br>(1.21–1.58)                                        | 1.27**<br>(1.09–1.47)                                       |
| <b>Quintile 5</b>                                                    | 1.84***<br>(1.61–2.10)                                        | 1.33***<br>(1.15–1.55)                                      |
| <b>Education<br/>(ref = mandatory)</b>                               |                                                               |                                                             |
| <b>Secondary school</b>                                              | 1.24***<br>(1.12–1.36)                                        | 0.91<br>(0.82–1.01)                                         |
| <b>Higher education</b>                                              | 1.81***<br>(1.61–2.03)                                        | 1.08***<br>(0.95–1.22)                                      |
| <b>Age at dialysis/being<br/>waitlisted, years<br/>(ref = 18–39)</b> |                                                               |                                                             |
| <b>40–49</b>                                                         | 0.74***<br>(0.64–0.85)                                        | 0.80**<br>(0.68–0.94)                                       |
| <b>50–59</b>                                                         | 0.52***<br>(0.46–0.60)                                        | 0.77***<br>(0.66–0.90)                                      |
| <b>60+</b>                                                           | 0.10***<br>(0.09–0.12)                                        | 0.81**<br>(0.69–0.95)                                       |
| <b>Gender (ref = female)</b>                                         |                                                               |                                                             |
| <b>Male</b>                                                          | 1.02<br>(0.94–1.12)                                           | 0.97<br>(0.88–1.06)                                         |
| <b>Year of dialysis/being waitlisted#</b>                            | 0.97***<br>(0.96–0.98)                                        | 1.01<br>(1.00–1.02)                                         |
| <b>Marital status<br/>(ref = married)</b>                            |                                                               |                                                             |
| <b>Single</b>                                                        | 0.76***<br>(0.69–0.84)                                        | 1.02<br>(0.92–1.14)                                         |
| <b>Divorced</b>                                                      | 0.87*<br>(0.78–0.97)                                          | 0.91<br>(0.80–1.03)                                         |
| <b>Widowed</b>                                                       | 0.41***<br>(0.32–0.51)                                        | 0.95*<br>(0.57–0.97)                                        |
| <b>Citizenship<br/>(ref = non-Swedish)</b>                           |                                                               |                                                             |
| <b>Swedish</b>                                                       | 1.30*<br>(1.05–1.60)                                          | 1.05<br>(0.84–1.31)                                         |
| <b>Missing</b>                                                       | 1.26<br>(0.98–1.63)                                           | 1.08<br>(0.82–1.44)                                         |
| <b>Home county\$<br/>(ref = no KTx centre)</b>                       |                                                               |                                                             |

|                             |                     |                        |
|-----------------------------|---------------------|------------------------|
| <b>KTx centre</b>           | 0.99<br>(0.92–1.08) | 0.95<br>(0.87–1.04)    |
| <b>Blood type (ref = O)</b> |                     |                        |
| <b>A</b>                    |                     | 2.05***<br>(1.86–2.27) |
| <b>B</b>                    |                     | 1.54***<br>(1.33–1.79) |
| <b>AB</b>                   |                     | 3.42***<br>(2.80–4.19) |

CI = confidence interval; HR = hazard ratio; ref = reference group; KTx = kidney transplantation. For a definition of quintiles 1–5, see Table 1. #Year of dialysis/being waitlisted was treated as a continuous variable. §Whether patients' home county has a Tx centre. \*\*\*p<0.001; \*\*p<0.01; \*p<0.05.
